# Supplementary material for: Facile preparation of a composite of TiO2 nanosheets and polyaniline and its gas sensing properties
Source: Royal Society of Chemistry journal article supplement (doi:10.1039/c5ra20879c), 2015-01-01
Supplement: c5ra20879c1.pdf [file c5ra20879c1.pdf]

## **Facile preparation of the composite of TiO<sub>2</sub> nanosheets and polyaniline and its gas sensing properties**

Yang Li\*, Huitao Ban, Huijie Zhao, Mujie Yang  
MOE Key Laboratory of Macromolecular Synthesis and Functionalization,  
Department of Polymer Science and Engineering, Cyrus Tang Center for sensor  
Materials and Applications, Zhejiang University, Hangzhou 310027, China

**\*Corresponding author.**

Address: Department of Polymer Science and Engineering, Zhejiang University,  
Hangzhou 310027 China

E-mail: [liyang@zju.edu.cn](mailto:liyang@zju.edu.cn) (Yang Li).

Tel.: +86-571-87952444

Fax: +86-571-87952444

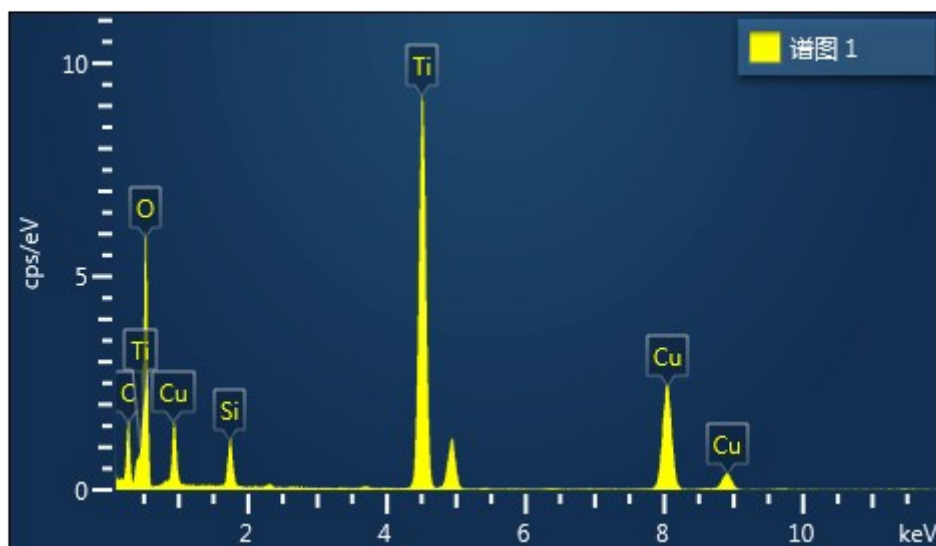

Fig. S1 EDX pattern of as-prepared  $\text{TiO}_2$  nanosheets.

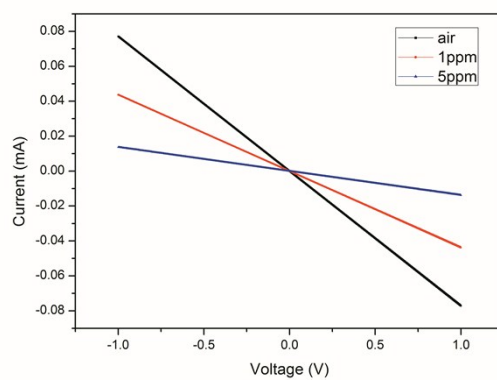

Fig. S2 I-V curves of the nanocomposite sensor in air and  $\text{NH}_3$  of different concentrations at room temperature.

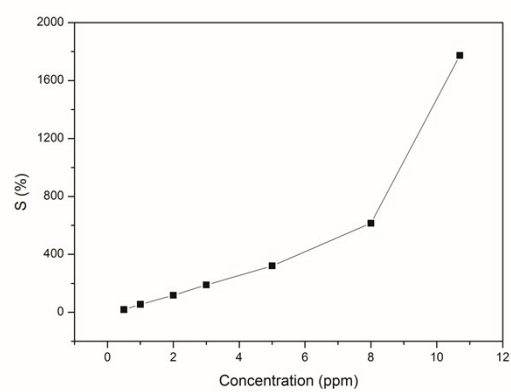

Fig. S3 Calibration curve of the gas sensor based on PANI.
